# Supplementary material for: The association between body mass index, abdominal fatness, and weight change and the risk of adult asthma: a systematic review and meta-analysis of cohort studies
Source: PubMed Central journal article supplement (PMC10182066; doi:10.1038/s41598-023-31373-6), 2023-05-12
Supplement: 41598_2023_31373_MOESM1_ESM.pdf [file 41598_2023_31373_MOESM1_ESM.pdf]

**Title Page****The Association between obesity and the risk of Adult Asthma: A Systematic Review and Meta-Analysis of Cohort Studies**

Ganeshkumar Parasuaraman<sup>1</sup>, Lavanya Ayyasamy<sup>1</sup>, Dagfinn Aune<sup>2,3,4</sup>, Abhijit Sen<sup>5,6</sup>, Ramya Nagarajan<sup>1</sup>, Prabhu Rajkumar<sup>1</sup>, Saravanakumar Velusamy<sup>1</sup>, P. Manickam<sup>1</sup>, Satish Sivaprakasam<sup>1</sup>

<sup>1</sup> Indian Council of Medical Research- National Institute of Epidemiology, Chennai, India

<sup>2</sup> Department of Nutrition, Oslo New University College, Oslo, Norway

<sup>3</sup> Department of Epidemiology and Biostatistics, School of Public Health, Imperial College London, London, United Kingdom

<sup>4</sup> Department of Endocrinology, Morbid Obesity and Preventive Medicine, Oslo University Hospital, Oslo, Norway

<sup>5</sup> Department of Public health and Nursing, Norwegian University of Science and Technology, Trondheim, Norway

<sup>6</sup> Center for Oral health Services and Research (TkMidt), Trondheim, Norway

**Corresponding Author:**

Ganeshkumar Parasuaraman, Scientist D, Indian Council of Medical Research- National Institute of Epidemiology, Chennai, India.

Email: ganeshkumar@nieicmr.org.in| ganeshkumardr@gmail.com

Phone number: +91 9840640483

**SUPPLEMENTARY APPENDIX**

**Supplementary Table 1: Search strategy in PubMed and EMBASE**

**Supplementary Table 2. List of excluded studies and exclusion reasons**

**Supplementary Table 3: Quality assessment**

**Supplementary Table 4: Relative risks from nonlinear dose-response of BMI and asthma and corresponding E-values**

**Supplementary Table 5: Relative Risks from nonlinear dose-response of waist circumference and asthma and corresponding E-values**

**Supplementary Table 6: Relative risks from nonlinear dose-response of weight gain and asthma and corresponding E-values**

**Supplementary Table 7: BMI and asthma, subgroup analyses**

**Supplementary Table 8: World Cancer Research Fund grading criteria**

**Supplementary Table 9: Justification for evidence grading of studies on adiposity and asthma risk**

**Supplementary Table 10: Evidence grading for adiposity and asthma**

**Supplementary Figure 1: Body mass index and asthma, high vs. low analysis**

**Supplementary Figure 2: Body mass index and asthma, influence analysis**

**Supplementary Figure 3: Funnel plot for analysis of body mass index and asthma**

**Supplementary Figure 4: Funnel plot for sensitivity analysis of body mass index and asthma (excluding Park et al, 2019)**

**Supplementary Figure 5: Waist circumference and asthma, high vs. low analysis**

**Supplementary Figure 6: Waist circumference and asthma, influence analysis**

**Supplementary Figure 7: Weight gain and asthma, high vs. low analysis**

**Supplementary Figure 8: Weight gain and asthma, influence analysis**

**Supplementary Figure 9: Weight loss and asthma, influence analysis**

**Supplementary Table 1: Search strategy in PubMed and EMBASE**

| S.NO | SEARCH TERMS in PUBMED                                                                                                                                                                                                                                                                                                                                                                                                                                                                                                                                                                                                                                                                                                                                                                                                                                                                                                                           | RESULTS     |
|------|--------------------------------------------------------------------------------------------------------------------------------------------------------------------------------------------------------------------------------------------------------------------------------------------------------------------------------------------------------------------------------------------------------------------------------------------------------------------------------------------------------------------------------------------------------------------------------------------------------------------------------------------------------------------------------------------------------------------------------------------------------------------------------------------------------------------------------------------------------------------------------------------------------------------------------------------------|-------------|
| #1   | asthma[MeSH Major Topic]<br>"asthma"[MeSH Major Topic]                                                                                                                                                                                                                                                                                                                                                                                                                                                                                                                                                                                                                                                                                                                                                                                                                                                                                           | 108,124     |
| #2   | ((((((((((adiposity[MeSH Terms]) OR (obesity[MeSH Terms])) OR (overweight[MeSH Terms])) OR (adipose tissue[MeSH Terms])) OR (body fat distribution[MeSH Terms])) OR (body mass index[MeSH Terms])) OR (adipose tissue hyperplasia[Title/Abstract])) OR (body weight[Title/Abstract])) OR (body composition[Title/Abstract])) OR (anthropometry[Title/Abstract])) OR (fatness[Title/Abstract])) OR (waist circumference[Title/Abstract])) OR (waist-to-hip-ratio[Title/Abstract])<br>"adiposity"[MeSH Terms] OR "obesity"[MeSH Terms] OR "overweight"[MeSH Terms] OR "adipose tissue"[MeSH Terms] OR "body fat distribution"[MeSH Terms] OR "body mass index"[MeSH Terms] OR "adipose tissue hyperplasia"[Title/Abstract] OR "body weight"[Title/Abstract] OR "body composition"[Title/Abstract] OR "anthropometry"[Title/Abstract] OR "fatness"[Title/Abstract] OR "waist circumference"[Title/Abstract] OR "waist-to-hip-ratio"[Title/Abstract] | 600,415     |
| #3   | (((((((cohort[Title/Abstract]) OR (prospective[Title/Abstract])) OR (longitudinal[Title/Abstract])) OR (nested case-control[Title/Abstract])) OR (follow-up[Title/Abstract])) OR (relative risk[Title/Abstract])) OR (odds ratio[Title/Abstract])) OR (hazard ratio[Title/Abstract])<br>"cohort"[Title/Abstract] OR "prospective"[Title/Abstract] OR "longitudinal"[Title/Abstract] OR "nested case control"[Title/Abstract] OR "follow-up"[Title/Abstract] OR "relative risk"[Title/Abstract] OR "odds ratio"[Title/Abstract] OR "hazard ratio"[Title/Abstract]                                                                                                                                                                                                                                                                                                                                                                                 | 2,289,895   |
| #4   | <b>#1 AND #2 AND #3</b>                                                                                                                                                                                                                                                                                                                                                                                                                                                                                                                                                                                                                                                                                                                                                                                                                                                                                                                          | 603         |
| S No | <b>Search strategy in EMBASE</b>                                                                                                                                                                                                                                                                                                                                                                                                                                                                                                                                                                                                                                                                                                                                                                                                                                                                                                                 | Results     |
| #1   | 'asthma'/exp/mj                                                                                                                                                                                                                                                                                                                                                                                                                                                                                                                                                                                                                                                                                                                                                                                                                                                                                                                                  | 1,77,172    |
| #2   | 'obesity'/exp/mj OR adiposity:ab,ti OR overweight:ab,ti OR 'adipose tissue':ab,ti OR 'body mass':ab,ti OR 'body weight disorder':ab,ti OR 'body composition':ab,ti OR anthropometry:ab,ti OR fatness:ab,ti OR fat:ab,ti OR 'waist circumference':ab,ti OR 'waist-to-hip ratio':ab,ti OR waist-to-height ratio OR anthropometry                                                                                                                                                                                                                                                                                                                                                                                                                                                                                                                                                                                                                   | 8,93,704    |
| #3   | 'cohort analysis'/exp/mj OR cohort:ab,ti OR 'prospective study':ab,ti OR 'longitudinal study':ab,ti OR 'nested case control study':ab,ti OR 'relative risk':ab,ti OR 'odds ratio':ab,ti OR 'follow up':ab,ti OR 'hazard ratio':ab,ti                                                                                                                                                                                                                                                                                                                                                                                                                                                                                                                                                                                                                                                                                                             | 2,900,216   |
| #4   | <b>#1 AND #2 AND #3</b>                                                                                                                                                                                                                                                                                                                                                                                                                                                                                                                                                                                                                                                                                                                                                                                                                                                                                                                          | <b>1048</b> |

**Supplementary Table 2. List of excluded studies and exclusion reasons**

| Exclusion reason                                          | Reference number |
|-----------------------------------------------------------|------------------|
| Conference abstract                                       | 1–8              |
| Cross-sectional study design                              | 9–21             |
| Childhood asthma                                          | 22–26            |
| Not relevant exposure                                     | 27               |
| Not relevant outcome                                      | 28–40            |
| Not relevant exposure and outcome (both are not relevant) | 41–47 48–51, 52  |
| Systematic review                                         | 53,54            |
| Unadjusted risk estimates                                 | 55,56            |

**References:**

1. Fitzpatrick S, Joks R, Shaikh W, Schneider A, Silverberg J. Obesity and super obesity are associated with increased risk of asthma in an inner city population. *Ann Allergy, Asthma Immunol.* 2010;105(5):A38.  
<https://www.embase.com/search/results?subaction=viewrecord&id=L70452814&from=export>
2. Landen A, Goksör E, Alm B, Wennergren G. Asthma and overweight-are they connected? A prospective study from a Swedish birth cohort. *Eur Respir J.* 2017;50. doi:10.1183/1393003.congress-2017.PA1321
3. To M, Ogura N, Kono Y, et al. Obesity-associated severe asthma in east asian population. *Am J Respir Crit Care Med.* 2017;195. doi:10.1164/ajrccmconference.2017.D106
4. Rennie DC, Karunanayake C, Pahwa P, et al. Assessing associations between asthma and obesity: Measures of adiposity. *Am J Respir Crit Care Med.* 2013;187. <https://www.embase.com/search/results?subaction=viewrecord&id=L71984049&from=export>
5. Rael E. Obesity correlates with asthma risk. *Am J Respir Crit Care Med.* 2015;191.  
<https://www.embase.com/search/results?subaction=viewrecord&id=L72052203&from=export>
6. Song W, Kang M, Lee S, et al. Association between abdominal obesity and asthma in the elderly: Results from a community-based population study. *Allergy Eur J Allergy Clin Immunol.* 2012;67:169. doi:10.1111/all.12035
7. Khurana S, Larj MJ, Lerner LB, et al. Correlation of Body Mass Index (BMI) with asthma severity and airway inflammation. *Am J Respir Crit Care Med.* 2010;181(1).
8. Porter M, Wegienka G, Havstad S, et al. Relationship between childhood body mass index and young adult asthma. *Ann allergy, asthma Immunol Off Publ Am Coll Allergy, Asthma, Immunol.* 2012;109(6):408-411.e1. doi:10.1016/j.anai.2012.09.009
9. Aguiar FS, Rodrigues L, Ludovice M, Araujo A, Zoucas M, Cardoso AP. Obesity and asthma: Data from a difficult asthma cohort under omalizumab treatment in Rio De Janeiro, Brazil. *Am J Respir Crit Care Med.* 2014;189.  
<https://www.embase.com/search/results?subaction=viewrecord&id=L72046553&from=export>
10. Arynchyn A, Zhu S, Terry G, et al. Ct-measured visceral adiposity is associated with asthma in middle-aged women: The cardia study. *Am J Respir Crit Care Med.* 2013;187.  
<https://www.embase.com/search/results?subaction=viewrecord&id=L71984502&from=export>
11. Stanley AH, Demissie K, Rhoads GG. Asthma development with obesity exposure: Observations from the cohort of the national health and nutrition evaluation survey epidemiologic follow-up study (NHEFS). *J Asthma.* 2005;42(2):97-99. doi:10.1081/JAS-

12. Sutherland ER, Lehman EB, Teodorescu M, Michael E Wechsler. Body mass index and phenotype in subjects with mild-to-moderate persistent asthma. *J Allergy Clin Immunol.* 2009;123(6):1328-34.e1. <https://pubmed.ncbi.nlm.nih.gov/19501235/>
13. Von Behren J, Lipsett M, Horn-Ross PL, et al. Obesity, waist size and prevalence of current asthma in the California Teachers Study cohort. *Thorax.* 2009;64(10):889-893. doi:10.1136/thx.2009.114579
14. Baltieri L, Cazzo E, de Souza AL, et al. Influence of weight loss on pulmonary function and levels of adipokines among asthmatic individuals with obesity: One-year follow-up. *Respir Med.* 2018;145:48-56. doi:10.1016/j.rmed.2018.10.017
15. Bråbäck L, Hjern A, Rasmussen F. Body mass index, asthma and allergic rhinoconjunctivitis in Swedish conscripts - A national cohort study over three decades. *Respir Med.* 2005;99(8):1010-1014. doi:10.1016/j.rmed.2005.02.004
16. Bruno A, Pace E, Cibella F, Chanez P. Body mass index and comorbidities in adult severe asthmatics. *Biomed Res Int.* 2014;2014:607192. doi:10.1155/2014/607192
17. Chandrasekhar D, Parambil AK, Puthur A, et al. An observational study to assess the prevalence and impact of obesity in asthma management. *J Young Pharm.* 2019;11(3):291-296. doi:10.5530/jyp.2019.11.58
18. Mosen DM, Schatz M, Magid DJ, Jr CAC. The relationship between obesity and asthma severity and control in adults. *J Allergy Clin Immunol.* 2008;122(3):507-11.e6. <https://pubmed.ncbi.nlm.nih.gov/18774387/>
19. Nystad W, Meyer HE, Nafstad P, Tverdal A, Engeland A. Body mass index in relation to adult asthma among 135,000 Norwegian men and women. *Am J Epidemiol.* 2004;160(10):969-976. doi:10.1093/aje/kwh303
20. Porter M, Wegienka G, Havstad S, et al. Relationship between childhood BMI and asthma in young adults in a birth cohort. *J Allergy Clin Immunol.* 2011;127(2):AB79. doi:10.1016/j.jaci.2010.12.323
21. Shaheen SO, Sterne JA, Montgomery SM, Azima H. Birth weight, body mass index and asthma in young adults. *Thorax.* 1999;54(5):396-402. doi:10.1136/thx.54.5.396
22. Loid P, Goksör E, Alm B, et al. A persistently high body mass index increases the risk of atopic asthma at school age. *Acta Paediatr.* 2015;104(7):707-712. doi:10.1111/apa.13015
23. Chinn S, Rona RJ. Can the increase in body mass index explain the rising trend in asthma in children? *Thorax.* 2001;56(11):845-850. doi:10.1136/thorax.56.11.845
24. Gilliland FD, Berhane K, Islam T, et al. Obesity and the risk of newly diagnosed asthma in school-age children. *Am J Epidemiol.* 2003;158(5):406-415. doi:10.1093/aje/kwg175
25. Jason E Lang, Bunnell HT, Hossain MJ, et al. Being Overweight or Obese and the Development of Asthma. *Pediatrics.* 2018;142(6). doi:10.1542/peds.2018-2119
26. Ho WC, Lin YS, Caffrey JL, et al. Higher body mass index may induce asthma among adolescents with pre-asthmatic symptoms: a prospective cohort study. *BMC Public Health.* 2011;11:542. doi:10.1186/1471-2458-11-542
27. Farina A, Crimi E, Accogli S, Camerini G, Adami GF. Preoperative assessment of respiratory function in severely obese patients undergoing biliopancreatic diversion. *Eur Surg Res Eur Chir Forschung Rech Chir Eur.* 2012;48(2):106-110. doi:10.1159/000337744
28. Acosta-Pérez E, Canino G, Ramírez R, Prelip M, Martin M, Ortega AN. Do Puerto Rican youth with asthma and obesity have higher odds for mental health disorders? *Psychosomatics.* 2012;53(2):162-171. doi:10.1016/j.psych.2011.07.011
29. Ciprandi G, Ricciardolo FLM, Signori A, et al. Increased body mass index and bronchial impairment in allergic rhinitis. *Am J Rhinol*

*Allergy*. 2013;27(6):e195-201. doi:10.2500/ajra.2013.27.3979

30. Sin DD, Jones RL, S F Paul Man. Obesity is a risk factor for dyspnea but not for airflow obstruction. *Arch Intern Med*. 2002;162(13):1477-1481. <https://pubmed.ncbi.nlm.nih.gov/12090884/>
31. Vortmann M, Eisner MD. BMI and health status among adults with asthma. *Obesity (Silver Spring)*. 2008;16(1):146-152. doi:10.1038/oby.2007.7
32. Zhang X, Hancox B, Gray A. Increasing childhood and adolescent adiposity impairs peak adult lung function. *Respirology*. 2019;24:166. doi:10.1111/resp.13492
33. Ciprandi G, Schiavetti I, Bellezza Fontana R, Sorbello V, Ricciardolo FLM. Overweight and obesity as risk factors for impaired lung function in patients with asthma: A real-life experience. *Allergy asthma Proc*. 2014;35(4):e62-71. doi:10.2500/aap.2014.35.3773
34. Huang KHG, Lai J, Nguyen H, et al. The impact of obesity on the outcome of status asthmaticus patients admitted to the intensive care unit. *Am J Respir Crit Care Med*. 2013;187. <https://www.embase.com/search/results?subaction=viewrecord&id=L71980961&from=export>
35. Lederer DJ, Wilt JS, D'Ovidio F, et al. Obesity and underweight are associated with an increased risk of death after lung transplantation. *Am J Respir Crit Care Med*. 2009;180(9):887-895. <https://pubmed.ncbi.nlm.nih.gov/19608717/>
36. Luthe SK, Hirayama A, Goto T, Faridi MK, Camargo CAJ, Hasegawa K. Association Between Obesity and Acute Severity Among Patients Hospitalized for Asthma Exacerbation. *J allergy Clin Immunol Pract*. 2018;6(6):1936-1941.e4. doi:10.1016/j.jaip.2018.02.001
37. Choi JH, Kim CH, Hyun IG, Kim JH, Shin TR, Park SM. Gender differentially contributes to airway hyperresponsiveness in adult asthmatics. *J Allergy Clin Immunol*. 2014;133(2):AB254. doi:10.1016/j.jaci.2013.12.904
38. S G Kapadia, Wei C, SJ B, et al. Obesity and symptoms of depression contribute independently to the poor asthma control of obesity. *Respir Med*. 2014;108(8):1100-1107. doi:10.1016/j.rmed.2014.05.012
39. Santamaria F, Montella S, Greco L, et al. Obesity duration is associated to pulmonary function impairment in obese subjects. *Obesity (Silver Spring)*. 2011;19(8):1623-1628. doi:10.1038/OBY.2011.1
40. Sharma S, Tailor A, Warrington R, Cheang M. Is obesity associated with an increased risk for airway hyperresponsiveness and development of asthma? *Allergy, Asthma Clin Immunol*. 2008;4(2):51-58. doi:10.2310/7480.2008.00008
41. Biswas A, Kessinger CJ, Camp D, et al. Differential effects of adipose distribution and adipokine levels on airway hyperresponsiveness among HIV-infected and HIV-uninfected persons with asthma. *Am J Respir Crit Care Med*. 2015;191. <https://www.embase.com/search/results?subaction=viewrecord&id=L72052578&from=export>
42. Çolak Y, Afzal S, Lange P, Nordestgaard BG. High body mass index and risk of exacerbations and pneumonias in individuals with chronic obstructive pulmonary disease: observational and genetic risk estimates from the Copenhagen General Population Study. *Int J Epidemiol*. 2016;45(5):1551-1559. doi:10.1093/ije/dyw051
43. Demeyer H, Donaire-Gonzalez D, Gimeno-Santos E, et al. Physical Activity Is Associated with Attenuated Disease Progression in Chronic Obstructive Pulmonary Disease. *Med Sci Sports Exerc*. 2019;51(5):833-840. doi:10.1249/MSS.0000000000001859
44. Denton E, Bondarenko J, Tay T, et al. Factors Associated with Dysfunctional Breathing in Patients with Difficult to Treat Asthma. *J Allergy Clin Immunol Pract*. 2019;7(5):1471-1476. doi:10.1016/j.jaip.2018.11.037
45. Dixon AE, Pratley RE, Forgione PM, et al. Effects of obesity and bariatric surgery on airway hyperresponsiveness, asthma control, and inflammation. *J Allergy Clin Immunol*. 2011;128(3):502-508. doi:10.1016/j.jaci.2011.06.009

46. J B D, Chapman L, O'Brien P. Marked improvement in asthma after Lap-Band surgery for morbid obesity. *Obes Surg*. 1999;9(4):385-389. <https://pubmed.ncbi.nlm.nih.gov/10484298/>
47. Wan ES, Cho MH, Boutaoui N, et al. Genome-wide association analysis of body mass in chronic obstructive pulmonary disease. *Am J Respir Cell Mol Biol*. 2011;45(2):304-310. <https://pubmed.ncbi.nlm.nih.gov/21037115/>
48. Bahreinian S, Ball GDC, Becker AB, Kozyrskyj AL. Comorbidity with depression and overweight in children with asthma. *Allergy, Asthma Clin Immunol*. 2010;6. doi:10.1186/1710-1492-6-S2-P10
49. Contreras Z, Chen Z, Roumeliotaki T, et al. Early childhood asthma and the risk of new onset obesity: An individual participant meta-analysis of 16 european birth cohorts. *Am J Respir Crit Care Med*. 2018;197(MeetingAbstracts). <https://www.embase.com/search/results?subaction=viewrecord&id=L622964992&from=export>
50. Del Rio B, Piñeyro EE, Berber A, Sienna JL. Evaluation and comparison of metabolic syndrome in obese adolescents with and without asthma based on diet and exercise for 6 months. *Ann Allergy, Asthma Immunol*. 2009;103(5):A65. <https://www.embase.com/search/results?subaction=viewrecord&id=L70254949&from=export>
51. Nava FV, González AHS, Perales GM, et al. [Associations between family history of allergy, exposure to tobacco smoke, active smoking, obesity, and asthma in adolescents]. *Arch Bronconeumol*. 2006;42(12):621-626. <https://pubmed.ncbi.nlm.nih.gov/17178065/>
52. Spathopoulos D, Paraskakis E, Trypsianis G, et al. The effect of obesity on pulmonary lung function of school aged children in Greece. *Pediatr Pulmonol*. 2009;44(3):273-280. doi:10.1002/ppul.20995
53. Camilo DF, Ribeiro JD, Toro ADC, Baracat ECE, Filho AAB. Obesity and asthma: association or coincidence? *J Pediatr (Rio J)*. 2010;86(1):6-14. <https://pubmed.ncbi.nlm.nih.gov/20151086/>
54. David A Beuther, Sutherland ER. Overweight, obesity, and incident asthma: a meta-analysis of prospective epidemiologic studies. *Am J Respir Crit Care Med*. 2007;175(7):661-666. doi:10.1164/rccm.200611-17170C
55. Guerra S, Sherrill DL, Bobadilla A, Martinez FD, Barbee RA. The relation of body mass index to asthma, chronic bronchitis, and emphysema. *Chest*. 2002;122(4):1256-1263. doi:10.1378/chest.122.4.1256
56. Kronander UN, Falkenberg M, Olle Z. Prevalence and incidence of asthma related to waist circumference and BMI in a Swedish community sample. *Respir Med*. 2004;98(11):1108-1116. doi:10.1016/j.rmed.2004.03.022

**Supplementary Table 3: Quality assessment**

| <b>Author name</b>             | <b>Selection of the non-exposed cohort</b> | <b>Ascertainment of exposure</b> | <b>Demonstration that outcome of interest was not present at start of study</b> | <b>Comparability of cohorts (adjustment for confounders)</b> | <b>Assessment of outcome</b> | <b>Was follow-up long enough for outcomes to occur</b> | <b>Adequacy of follow-up of cohorts</b> | <b>Total</b> |
|--------------------------------|--------------------------------------------|----------------------------------|---------------------------------------------------------------------------------|--------------------------------------------------------------|------------------------------|--------------------------------------------------------|-----------------------------------------|--------------|
| Camargo et al., 1999, USA      | 1                                          | 1                                | 1                                                                               | 2                                                            | 0                            | 1                                                      | 1                                       | 7            |
| Chen et al, 2002, Canada       | 1                                          | 1                                | 1                                                                               | 1.5                                                          | 0                            | 1                                                      | 0                                       | 5.5          |
| Huovinen et al., 2003, Finland | 1                                          | 1                                | 1                                                                               | 0.75                                                         | 0                            | 1                                                      | 0                                       | 4.75         |
| Romieu et al.,2003, France     | 1                                          | 1                                | 1                                                                               | 2                                                            | 0                            | 1                                                      | 1                                       | 7            |
| Ford et al., 2004, USA         | 1                                          | 1                                | 1                                                                               | 1.75                                                         | 0                            | 1                                                      | 1                                       | 6.75         |
| Coogan et al, 2009, USA        | 1                                          | 1                                | 1                                                                               | 2                                                            | 0                            | 1                                                      | 0                                       | 6            |
| Hjellvik et al., 2010, Norway  | 1                                          | 1                                | 1                                                                               | 1.75                                                         | 0.5                          | 1                                                      | 1                                       | 7.25         |
| Korda et al.,2012, Australia   | 1                                          | 1                                | 1                                                                               | 1.25                                                         | 1                            | 1                                                      | 0                                       | 6.25         |
| Brumpton et al., 2012, Norway  | 1                                          | 1                                | 1                                                                               | 1.25                                                         | 0                            | 1                                                      | 1                                       | 6.25         |
| Leone et al., 2012, France     | 1                                          | 1                                | 1                                                                               | 2                                                            | 0                            | 1                                                      | 0                                       | 6            |
| Assad et al, 2013,             | 1                                          | 1                                | 1                                                                               | 1                                                            | 0                            | 1                                                      | 0                                       | 5            |
| Tomita et al, 2018, Japan      | 1                                          | 1                                | 1                                                                               | 1                                                            | 0.5                          | 1                                                      | 0                                       | 5.5          |
| Park et al.,2019, Korea        | 1                                          | 1                                | 1                                                                               | 0                                                            | 0.5                          | 1                                                      | 0                                       | 4.5          |
| Wang et al, 2020, China        | 1                                          | 1                                | 1                                                                               | 0.75                                                         | 0                            | 1                                                      | 0                                       | 4.75         |
| Wang et al, 2021, USA          | 1                                          | 1                                | 1                                                                               | 1.75                                                         | 0                            | 1                                                      | 0                                       | 5.75         |



**Supplementary Table 4: Relative risks from nonlinear dose-response of BMI and asthma and corresponding E-values**

| <b>BMI</b>                | <b>RR (95% CI)</b> | <b>E-values (lower CI)</b> |
|---------------------------|--------------------|----------------------------|
| 17.5                      | 0.98 (0.93-1.03)   | 1.16 (NC)                  |
| 20.0                      | 1.00               |                            |
| 22.5                      | 1.09 (1.05-1.13)   | 1.40 (1.28)                |
| 25.0                      | 1.23 (1.17-1.30)   | 1.76 (1.62)                |
| 27.5                      | 1.43 (1.34-1.53)   | 2.21 (2.01)                |
| 30.0                      | 1.69 (1.57-1.83)   | 2.77 (2.52)                |
| 32.5                      | 2.03 (1.86-2.21)   | 3.48 (3.12)                |
| 35.0                      | 2.45 (2.23-2.69)   | 4.33 (3.89)                |
| 37.5                      | 2.97 (2.68-3.30)   | 5.39 (4.80)                |
| 40.0                      | 3.64 (3.23-4.09)   | 6.74 (5.91)                |
| p <sub>nonlinearity</sub> | <0.00001           |                            |

NC: not calculable

**Supplementary Table 5: Relative Risks from nonlinear dose-response of waist circumference and asthma and corresponding E-values**

| <b>WC</b>     | <b>RR (95% CI) all</b> | <b>E-value (lower CI)</b> |
|---------------|------------------------|---------------------------|
| 70            | 1.00                   | 1.00                      |
| 75            | 1.08 (1.04-1.13)       | 1.40 (1.24)               |
| 80            | 1.17 (1.08-1.26)       | 1.67 (1.43)               |
| 85            | 1.25 (1.14-1.38)       | 1.90 (1.59)               |
| 90            | 1.34 (1.20-1.51)       | 2.15 (1.76)               |
| 95            | 1.44 (1.25-1.65)       | 2.39 (1.92)               |
| 100           | 1.53 (1.31-1.79)       | 2.64 (2.08)               |
| 105           | 1.63 (1.36-1.96)       | 2.90 (2.21)               |
| 110           | 1.73 (1.40-2.15)       | 3.19 (2.34)               |
| pnonlinearity | 0.02                   |                           |

**Supplementary Table 6: Relative risks from nonlinear dose-response of weight gain and asthma and corresponding E-values**

| <b>Weight gain</b>        | <b>RR (95% CI)</b> | <b>E-values (lower CI)</b> |
|---------------------------|--------------------|----------------------------|
| 0                         | 1.00               |                            |
| 5                         | 0.95 (0.85-1.07)   | 1.28 (NC)                  |
| 10                        | 1.14 (1.02-1.26)   | 1.54 (1.16)                |
| 15                        | 1.36 (1.23-1.51)   | 2.06 (1.76)                |
| 20                        | 1.63 (1.47-1.81)   | 2.64 (2.30)                |
| 25                        | 1.96 (1.74-2.20)   | 3.33 (2.87)                |
| 30                        | 2.35 (2.06-2.68)   | 4.13 (3.54)                |
| p <sub>nonlinearity</sub> | 0.002              |                            |

NC: not calculable

**Supplementary Table 7: BMI and asthma, subgroup analyses**

|                                        | <b>BMI and asthma, per 5 kg/m<sup>2</sup></b> |                  |                              |                                    |                                    |
|----------------------------------------|-----------------------------------------------|------------------|------------------------------|------------------------------------|------------------------------------|
|                                        | <i>n</i>                                      | RR (95% CI)      | <i>I</i> <sup>2</sup><br>(%) | <i>P</i> <sub>h</sub> <sup>1</sup> | <i>P</i> <sub>h</sub> <sup>2</sup> |
| <b>All studies</b>                     | 13                                            | 1.32 (1.21-1.44) | 95.3                         | <0.0001                            |                                    |
| <b>Duration of follow-up</b>           |                                               |                  |                              |                                    |                                    |
| <10 years follow-up                    | 8                                             | 1.36 (1.20-1.55) | 96.6                         | <0.0001                            | 0.41                               |
| ≥10 years follow-up                    | 5                                             | 1.26 (1.18-1.36) | 65.1                         | 0.02                               |                                    |
| <b>Sex</b>                             |                                               |                  |                              |                                    |                                    |
| Men                                    | 6                                             | 1.15 (0.98-1.35) | 77.7                         | <0.0001                            | 0.20/<br>0.10 <sup>3</sup>         |
| Women                                  | 10                                            | 1.35 (1.23-1.49) | 89.0                         | <0.0001                            |                                    |
| Men and women                          | 3                                             | 1.32 (1.15-1.52) | 91.1                         | <0.0001                            |                                    |
| <b>Geographic location</b>             |                                               |                  |                              |                                    |                                    |
| Europe                                 | 4                                             | 1.34 (1.30-1.38) | 0                            | 0.60                               | 0.93                               |
| North America                          | 5                                             | 1.33 (1.17-1.50) | 88.3                         | <0.0001                            |                                    |
| Australia                              | 1                                             | 1.58 (1.37-1.83) |                              |                                    |                                    |
| Asia                                   | 3                                             | 1.16 (1.03-1.32) | 56.9                         | 0.10                               |                                    |
| <b>Assessment of weight and height</b> |                                               |                  |                              |                                    |                                    |
| Self-reported                          | 3                                             | 1.38 (1.19-1.60) | 0                            | 0.58                               | 0.07                               |
| Self-reported and validated            | 2                                             | 1.60 (1.48-1.72) | 0                            | 0.87                               |                                    |
| Measured                               | 8                                             | 1.25 (1.14-1.37) | 95.9                         | <0.0001                            |                                    |
| <b>Number of cases</b>                 |                                               |                  |                              |                                    |                                    |
| Cases <250                             | 3                                             | 1.32 (1.13-1.54) | 0                            | 0.86                               | 0.92                               |
| Cases 250-999                          | 4                                             | 1.32 (1.13-1.53) | 98.6                         | <0.0001                            |                                    |
| Cases ≥1000                            | 6                                             | 1.32 (1.19-1.46) | 76.1                         | 0.001                              |                                    |
| <b>Study quality</b>                   |                                               |                  |                              |                                    |                                    |
| 0-3 stars                              | 0                                             |                  |                              |                                    | 0.02                               |
| >3-6 stars                             | 7                                             | 1.22 (1.11-1.33) | 88.6                         | <0.0001                            |                                    |

|                                           |     |    |                  |      |         |      |
|-------------------------------------------|-----|----|------------------|------|---------|------|
| >6-8 stars                                |     | 6  | 1.42 (1.31-1.54) | 73.7 | 0.002   |      |
| <b>Adjustment for confounding factors</b> |     |    |                  |      |         |      |
| Age                                       | Yes | 13 | 1.32 (1.21-1.44) | 95.3 | <0.0001 | NC   |
|                                           | No  | 0  |                  |      |         |      |
| Family history of asthma                  | Yes | 2  | 1.44 (1.22-1.69) | 73.8 | 0.05    | 0.29 |
|                                           | No  | 11 | 1.30 (1.18-1.43) | 95.5 | <0.0001 |      |
| Allergy                                   | Yes | 3  | 1.28 (1.13-1.44) | 0    | 0.80    | 0.79 |
|                                           | No  | 10 | 1.33 (1.21-1.47) | 96.4 | <0.0001 |      |
| Education                                 | Yes | 4  | 1.36 (1.28-1.44) | 43.2 | 0.15    | 0.43 |
|                                           | No  | 9  | 1.30 (1.16-1.44) | 93.5 | <0.0001 |      |
| Income                                    | Yes | 4  | 1.31 (1.12-1.53) | 95.7 | <0.0001 | 0.77 |
|                                           | No  | 9  | 1.33 (1.23-1.43) | 78.3 | <0.0001 |      |
| Alcohol                                   | Yes | 4  | 1.33 (1.04-1.69) | 89.8 | <0.0001 | 0.83 |
|                                           | No  | 9  | 1.32 (1.24-1.41) | 78.4 | <0.0001 |      |
| Smoking                                   | Yes | 12 | 1.33 (1.21-1.45) | 95.7 | <0.0001 | 0.79 |
|                                           | No  | 1  | 1.26 (1.00-1.60) |      |         |      |
| Physical activity                         | Yes | 8  | 1.30 (1.17-1.44) | 97.0 | <0.0001 | 0.54 |
|                                           | No  | 5  | 1.48 (1.23-1.53) | 26.9 | 0.24    |      |

Abbreviations: NC not calculable because no studies were present in one of the subgroups; RRs relative risk estimates.

n denotes the number of studies included in each subgroup analysis

<sup>1</sup> P-value for heterogeneity within each subgroup

<sup>2</sup> P-value for heterogeneity between subgroups with meta-regression analysis

<sup>3</sup> P-value for heterogeneity between men and women with meta-regression analysis (excluding studies of men and women combined)

**Supplemental Table 8. World Cancer Research Fund grading criteria**

| Grading                             | Criteria                                                                                                                                                                                                                                                                                                                                                                                                                                                                                                                                                                                                                                                                                                                                                                                                                                                                                                                                                                                                                                                                                                                                                                    |
|-------------------------------------|-----------------------------------------------------------------------------------------------------------------------------------------------------------------------------------------------------------------------------------------------------------------------------------------------------------------------------------------------------------------------------------------------------------------------------------------------------------------------------------------------------------------------------------------------------------------------------------------------------------------------------------------------------------------------------------------------------------------------------------------------------------------------------------------------------------------------------------------------------------------------------------------------------------------------------------------------------------------------------------------------------------------------------------------------------------------------------------------------------------------------------------------------------------------------------|
| Convincing                          | <p>A convincing relationship should be robust enough to be highly unlikely to be modified in the foreseeable future as new evidence accumulates. All of the following are generally required:</p> <ul style="list-style-type: none"> <li>- Evidence from more than one study type</li> <li>- Evidence from at least two independent cohort studies</li> <li>- No substantial unexplained heterogeneity within or between study types or in different populations relating to the presence or absence of an association, or direction of effect</li> <li>- Good quality studies to exclude with confidence the possibility that the observed association results from random or systematic error, including confounding, measurement error, and selection bias</li> <li>- Presence of a plausible biological gradient in the association. Such a gradient need not be linear or even in the same direction across different levels of exposure, so long as this can be explained plausibly</li> <li>- Strong and plausible experimental evidence, either from human studies or relevant animal models, that typical human exposures can lead to relevant outcomes</li> </ul> |
| Probable                            | <p>All of the following are generally required:</p> <ul style="list-style-type: none"> <li>- Evidence from at least two independent cohort studies, or at least five case-control studies</li> <li>- No substantial unexplained heterogeneity within or between study types or in different populations relating to the presence or absence of an association, or direction of effect</li> <li>- Good quality studies to exclude with confidence the possibility that the observed association results from random or systematic error, including confounding, measurement error, and selection bias</li> <li>- Evidence for biological plausibility</li> </ul>                                                                                                                                                                                                                                                                                                                                                                                                                                                                                                             |
| Limited - suggestive                | <p>All of the following are generally required:</p> <ul style="list-style-type: none"> <li>- Evidence from at least two independent cohort studies, or at least five case-control studies</li> <li>- The direction of effect is generally consistent though some unexplained heterogeneity may be present</li> <li>- Evidence for biological plausibility</li> </ul>                                                                                                                                                                                                                                                                                                                                                                                                                                                                                                                                                                                                                                                                                                                                                                                                        |
| Limited - no conclusion             | <p>Evidence is so limited that no firm conclusion can be made, but this does not mean that there is evidence of no relationship. The evidence might be graded "limited - no conclusion" for several reasons:</p> <ul style="list-style-type: none"> <li>- limited number of studies</li> <li>- inconsistency of direction of effect</li> <li>- poor quality of studies (e.g. lack of adjustment for known confounders)</li> <li>- or any combination of these factors</li> </ul>                                                                                                                                                                                                                                                                                                                                                                                                                                                                                                                                                                                                                                                                                            |
| Substantial effect on risk unlikely | <p>All of the following are generally required:</p> <ul style="list-style-type: none"> <li>- Evidence from more than one study type</li> <li>- Evidence from at least two independent cohort studies</li> </ul>                                                                                                                                                                                                                                                                                                                                                                                                                                                                                                                                                                                                                                                                                                                                                                                                                                                                                                                                                             |

|  |                                                                                                                                                                                                                                                                                                                                                                                                                                                                                                                                                                                                                                                                                                                                                                                                                    |
|--|--------------------------------------------------------------------------------------------------------------------------------------------------------------------------------------------------------------------------------------------------------------------------------------------------------------------------------------------------------------------------------------------------------------------------------------------------------------------------------------------------------------------------------------------------------------------------------------------------------------------------------------------------------------------------------------------------------------------------------------------------------------------------------------------------------------------|
|  | <ul style="list-style-type: none"> <li>- Summary estimate of effect close to 1.0 for comparison of high versus low exposure categories</li> <li>- No substantial unexplained heterogeneity within or between study types or in different populations</li> <li>- Good quality studies to exclude with confidence the possibility that the absence of association results from random or systematic error, including inadequate power, imprecision or error in exposure measurement, inadequate range of exposure, confounding, and selection bias</li> <li>- Absence of a demonstrable biological gradient (dose response)</li> <li>- Absence of strong and plausible experimental evidence, either from human studies or relevant animal models, that typical human exposures lead to relevant outcomes</li> </ul> |
|--|--------------------------------------------------------------------------------------------------------------------------------------------------------------------------------------------------------------------------------------------------------------------------------------------------------------------------------------------------------------------------------------------------------------------------------------------------------------------------------------------------------------------------------------------------------------------------------------------------------------------------------------------------------------------------------------------------------------------------------------------------------------------------------------------------------------------|

Specific upgrading factors:

- 1) Presence of a plausible biological gradient (dose response) in the association. Such a gradient need not be linear or even in the same direction across the different levels of exposure, so long as this can be explained plausibly.
- 2) A particularly large summary effect size (an odds ratio or relative risk of 2.0 or more, depending on the unit of exposure ) after appropriate control for confounders.
- 3) Evidence from randomised trials in humans.
- 4) Evidence from appropriately controlled experiments demonstrating one or more plausible and specific mechanisms actually operating in humans.
- 5) Robust and reproducible evidence from experimental studies in appropriate animal models showing that typical human exposures can lead to relevant health outcomes.

**Supplemental Table 9. Justification for evidence grading of studies on adiposity and asthma risk**

| <b>Requirements for grading of convincing</b>                                                                                                                                    | <b>BMI</b>                                                                                                                                                                                                                                                                                                | <b>Waist circumference</b>                                                                                                                                                                                          | <b>Weight gain</b>                                                                                                                                                                                                  | <b>Weight loss</b>                                                                                                                                                                                                  |
|----------------------------------------------------------------------------------------------------------------------------------------------------------------------------------|-----------------------------------------------------------------------------------------------------------------------------------------------------------------------------------------------------------------------------------------------------------------------------------------------------------|---------------------------------------------------------------------------------------------------------------------------------------------------------------------------------------------------------------------|---------------------------------------------------------------------------------------------------------------------------------------------------------------------------------------------------------------------|---------------------------------------------------------------------------------------------------------------------------------------------------------------------------------------------------------------------|
| Statistically significant and robust association                                                                                                                                 | Statistically significant strong positive association in high vs. low, linear and nonlinear dose-response analyses. Association is robust in influence analyses.                                                                                                                                          | Statistically significant strong positive association in high vs. low, linear and nonlinear dose-response analyses. The association is robust in influence analyses.                                                | Statistically significant strong positive association in high vs. low, linear and nonlinear dose-response analyses. The association is robust in influence analyses.                                                | Non-significant weak inverse association, which is not substantially altered in influence analyses.                                                                                                                 |
| Evidence from at least two independent cohort studies                                                                                                                            | 13 cohort studies                                                                                                                                                                                                                                                                                         | 4 cohort studies                                                                                                                                                                                                    | 4 cohort studies                                                                                                                                                                                                    | 4 cohort studies                                                                                                                                                                                                    |
| No substantial unexplained heterogeneity within or between study types or in different populations relating to the presence or absence of an association, or direction of effect | There is high heterogeneity overall, but this is with regard to the strength of the association more than the direction of the association. All studies reported risk estimates in the direction of increased risk. Lower heterogeneity in some subgroups. Consistent findings across geographic regions. | There is high heterogeneity overall, but this is with regard to the strength of the association more than the direction of the association. All studies reported risk estimates in the direction of increased risk. | There is high heterogeneity overall, but this is with regard to the strength of the association more than the direction of the association. All studies reported risk estimates in the direction of increased risk. | There is high heterogeneity overall, but this is with regard to the strength of the association more than the direction of the association. All studies reported risk estimates in the direction of increased risk. |
| Good quality studies to exclude with confidence the possibility that the observed association results from random or systematic error, including confounding,                    | Moderately high study quality. Publication bias is explained by one large study with a lower estimate than the remaining studies which is driving the asymmetry in the funnel plot. Little indication of                                                                                                  | Moderately high study quality. Too few studies to test for publication bias and for meaningful subgroup analyses. All studies excluded subjects with prevalent                                                      | Moderately high study quality. Too few studies to test for publication bias and for meaningful subgroup analyses. All studies excluded subjects with prevalent                                                      | Moderately high study quality. Too few studies to test for publication bias and for meaningful subgroup analyses. All studies excluded subjects with prevalent                                                      |



|                                                                                                                                                                                                                         |                                                                                                                                                                                                                                                                                                                                                                                                                                                                                                                                          |                                                                                                                                        |                                                                                                                                                       |                                                                                                                    |
|-------------------------------------------------------------------------------------------------------------------------------------------------------------------------------------------------------------------------|------------------------------------------------------------------------------------------------------------------------------------------------------------------------------------------------------------------------------------------------------------------------------------------------------------------------------------------------------------------------------------------------------------------------------------------------------------------------------------------------------------------------------------------|----------------------------------------------------------------------------------------------------------------------------------------|-------------------------------------------------------------------------------------------------------------------------------------------------------|--------------------------------------------------------------------------------------------------------------------|
| <p>measurement error, and selection bias</p>                                                                                                                                                                            | <p>between subgroup heterogeneity. Stronger association in studies with high quality.</p> <p>Somewhat stronger association in studies with self-reported weight and height compared to studies with measured weight and height (although no significant between subgroup heterogeneity), however, the association is also significant among studies with measured data.</p> <p>All studies excluded subjects with prevalent asthma at baseline.</p> <p>Exposed and non-exposed participants were selected from the same populations.</p> | <p>asthma at baseline.</p> <p>Exposed and non-exposed participants were selected from the same population.</p>                         | <p>asthma at baseline.</p> <p>Exposed and non-exposed participants were selected from the same population.</p>                                        | <p>asthma at baseline.</p> <p>Exposed and non-exposed participants were selected from the same population.</p>     |
| <p>Presence of a plausible biological gradient in the association. Such a gradient need not be linear or even in the same direction across different levels of exposure, so long as this can be explained plausibly</p> | <p>Evidence of a strong dose-response relationship, with increased risk above a BMI of 18-20 (<math>p_{\text{nonlinearity}} &lt; 0.0001</math>).</p>                                                                                                                                                                                                                                                                                                                                                                                     | <p>Evidence of a strong dose-response relationship, with increased risk above 70 cm (<math>p_{\text{nonlinearity}} = 0.02</math>).</p> | <p>Evidence of a strong dose-response relationship, with increased risk from 10 kg of weight gain (<math>p_{\text{nonlinearity}} = 0.002</math>).</p> | <p>Dose-response analyses were not possible because there was only one category of weight loss across studies.</p> |

|                                                                                                                                                                    |                                                                                                                                                                                                                                                                                                                                                                                                                                                                                                                                                 |                                                                                                                                                                                                                                                                                                                                                                                                                                                                                     |                                                                                                                                                                                                                                                                                                                                                                                                                                                                                                                                      |                                                                                                                                                                                                                                                                                                                                                                                                                                                                              |
|--------------------------------------------------------------------------------------------------------------------------------------------------------------------|-------------------------------------------------------------------------------------------------------------------------------------------------------------------------------------------------------------------------------------------------------------------------------------------------------------------------------------------------------------------------------------------------------------------------------------------------------------------------------------------------------------------------------------------------|-------------------------------------------------------------------------------------------------------------------------------------------------------------------------------------------------------------------------------------------------------------------------------------------------------------------------------------------------------------------------------------------------------------------------------------------------------------------------------------|--------------------------------------------------------------------------------------------------------------------------------------------------------------------------------------------------------------------------------------------------------------------------------------------------------------------------------------------------------------------------------------------------------------------------------------------------------------------------------------------------------------------------------------|------------------------------------------------------------------------------------------------------------------------------------------------------------------------------------------------------------------------------------------------------------------------------------------------------------------------------------------------------------------------------------------------------------------------------------------------------------------------------|
| <p>Strong and plausible experimental evidence, either from human studies or relevant animal models, that typical human exposures can lead to relevant outcomes</p> | <p>There is evidence for plausible mechanisms including studies showing narrowing airways, reduced lung volume, and reduced lung function with higher BMI. There is some indication from cohorts and trials that weight loss among obese subjects can improve lung function.</p>                                                                                                                                                                                                                                                                | <p>There is evidence for plausible mechanisms including studies showing narrowing airways, reduced lung volume, and reduced lung function with higher BMI. There is some indication from cohorts and trials that weight loss among obese subjects can improve lung function.</p>                                                                                                                                                                                                    | <p>There is evidence for plausible mechanisms including studies showing narrowing airways, reduced lung volume, and reduced lung function with higher BMI and these are likely to extend to weight gain. There is some indication from cohorts and trials that weight loss among obese subjects can improve lung function.</p>                                                                                                                                                                                                       | <p>There is evidence for plausible mechanisms including studies showing narrowing airways, reduced lung volume, and reduced lung function with higher BMI and these are likely to extend to weight gain. There is some indication from cohorts and trials that weight loss among obese subjects can improve lung function.</p>                                                                                                                                               |
| <p>Final grading and justification for overall assessment.</p>                                                                                                     | <p>Convincing evidence that higher BMI increases the risk of asthma.</p> <p>Justification: Strong positive associations observed across a large number of cohort studies, which are significant across high vs. low, linear and nonlinear dose-response analyses. Results are consistent results across regions and robust in influence analyses.</p> <p>Although heterogeneity is high, all studies report effect estimates in the direction of increased risk.</p> <p>Although Egger's test indicates possible publication bias, the test</p> | <p>Limited-suggestive evidence that higher waist circumference increases the risk of asthma.</p> <p>Justification: Strong positive associations observed across four cohort studies which are significant across all analyses. Too few studies to conduct meaningful subgroup analyses and to test for publication bias. The results are robust in influence analyses.</p> <p>Although heterogeneity is high, all studies report effect estimates in the direction of increased</p> | <p>Limited-suggestive evidence that higher weight gain increases the risk of asthma.</p> <p>Justification: Strong positive associations observed across four cohort studies which are significant across all analyses. Too few studies to conduct meaningful subgroup analyses and to test for publication bias.</p> <p>The results are robust in influence analyses.</p> <p>Although heterogeneity is high, all studies report effect estimates in the direction of increased risk. Biologically plausible mechanisms exist for</p> | <p>Limited – no conclusion evidence for an association between weight loss and asthma.</p> <p>Justification: Non-significant inverse association based on four cohort studies. Too few studies to conduct meaningful subgroup analyses and to test for publication bias. The results do not change in influence analyses.</p> <p>There is no heterogeneity.</p> <p>Biologically plausible mechanisms exist for general obesity are likely to apply also for weight gain.</p> |

|  |                                                                                                                                                                                               |                                                                                                                     |                                                                  |  |
|--|-----------------------------------------------------------------------------------------------------------------------------------------------------------------------------------------------|---------------------------------------------------------------------------------------------------------------------|------------------------------------------------------------------|--|
|  | <p>and the asymmetry in the funnel plot is explained by one large study which shows a much weaker association than the remaining studies.</p> <p>Biologically plausible mechanisms exist.</p> | <p>risk. Biologically plausible mechanisms exist for general obesity and may also apply to waist circumference.</p> | <p>general obesity are likely to apply also for weight gain.</p> |  |
|--|-----------------------------------------------------------------------------------------------------------------------------------------------------------------------------------------------|---------------------------------------------------------------------------------------------------------------------|------------------------------------------------------------------|--|

**Supplemental Table 10. Evidence grading for adiposity and asthma**

|                         | <b>Reduced risk</b> | <b>Increased risk</b>            |
|-------------------------|---------------------|----------------------------------|
| Convincing              | -                   | BMI                              |
| Probable                | -                   | -                                |
| Limited-suggestive      | -                   | Waist circumference, weight gain |
| Limited - no conclusion | Weight loss         |                                  |

Supplementary figure 1. Body mass index and asthma, high vs. low analysis

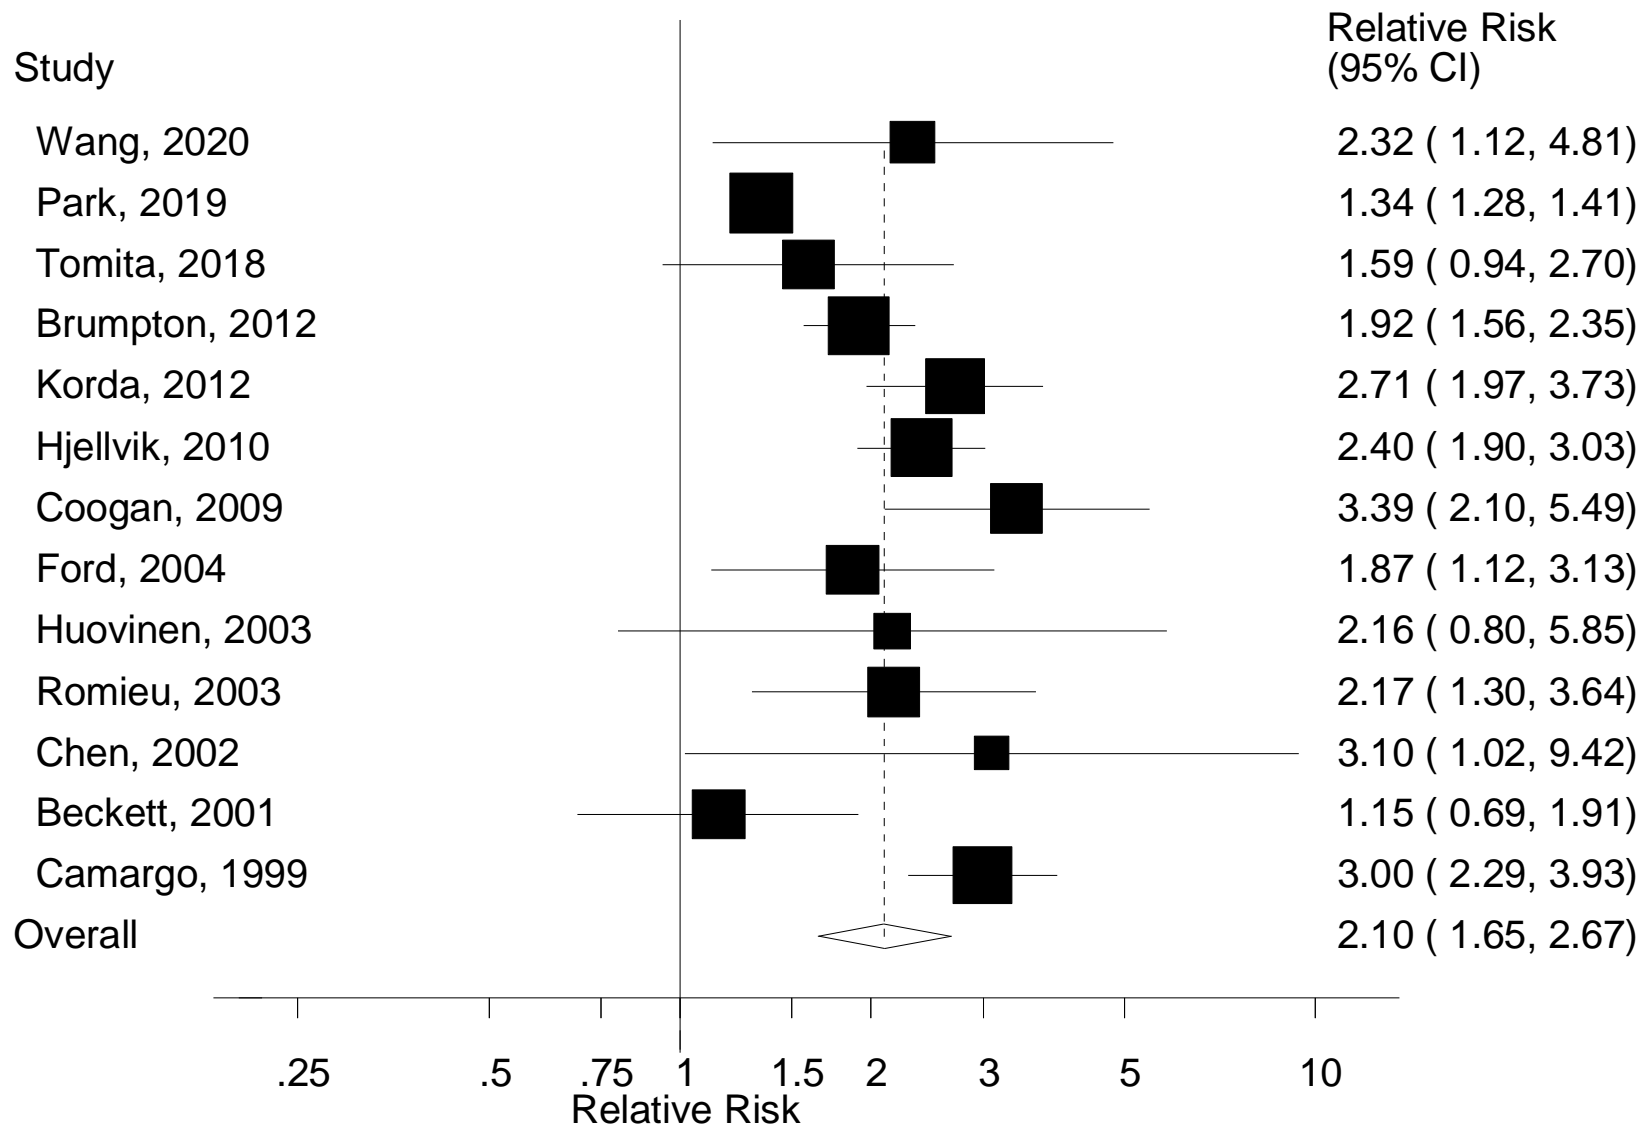

Supplementary Figure 2. Body mass index and asthma, influence analysis

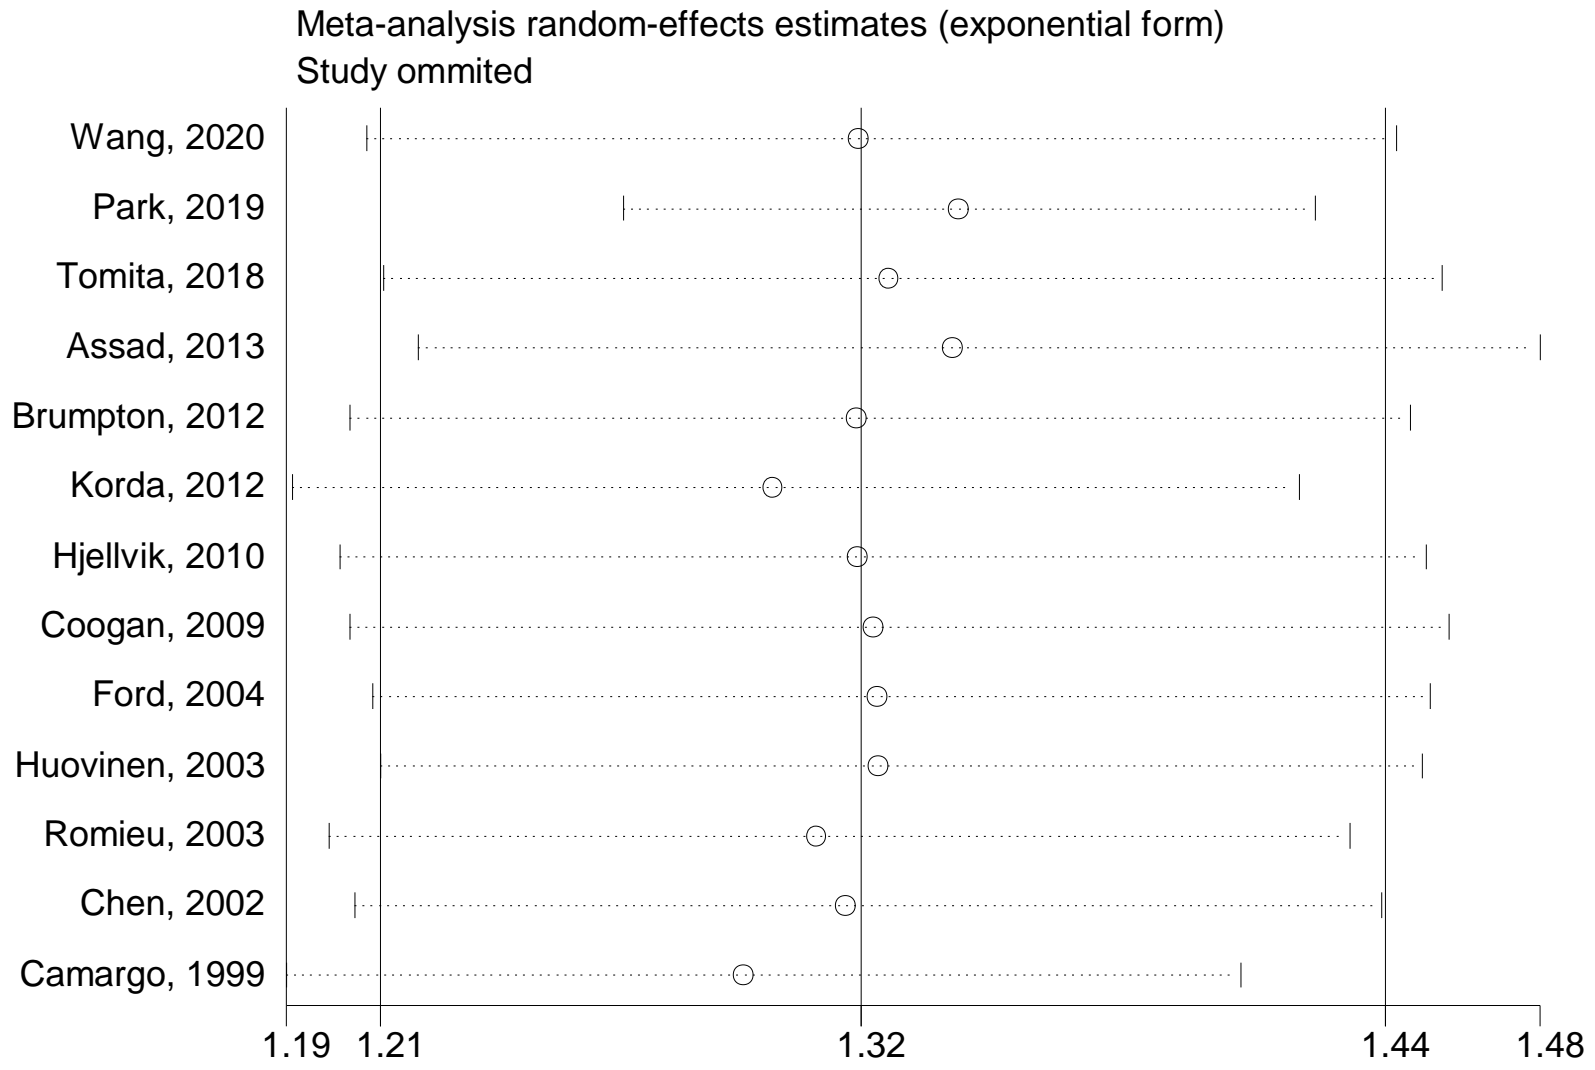

| Study omitted   | RR (95% CI)             |
|-----------------|-------------------------|
| Wang, 2020      | 1.32 (1.20-1.44)        |
| Park, 2019      | 1.34 (1.26-1.42)        |
| Tomita, 2018    | 1.32 (1.21-1.45)        |
| Assad, 2013     | 1.34 (1.22-1.47)        |
| Brumpton, 2012  | 1.32 (1.20-1.44)        |
| Korda, 2012     | 1.30 (1.19-1.42)        |
| Hjellvik, 2010  | 1.32 (1.20-1.45)        |
| Coogan, 2009    | 1.32 (1.20-1.45)        |
| Ford, 2004      | 1.32 (1.20-1.45)        |
| Huovinen, 2003  | 1.32 (1.21-1.45)        |
| Romieu, 2003    | 1.31 (1.19-1.43)        |
| Chen, 2002      | 1.31 (1.20-1.44)        |
| Camargo, 1999   | 1.29 (1.18-1.40)        |
| <b>Combined</b> | <b>1.32 (1.21-1.44)</b> |

Supplementary Figure 3. Funnel plot for analysis of body mass index and asthma

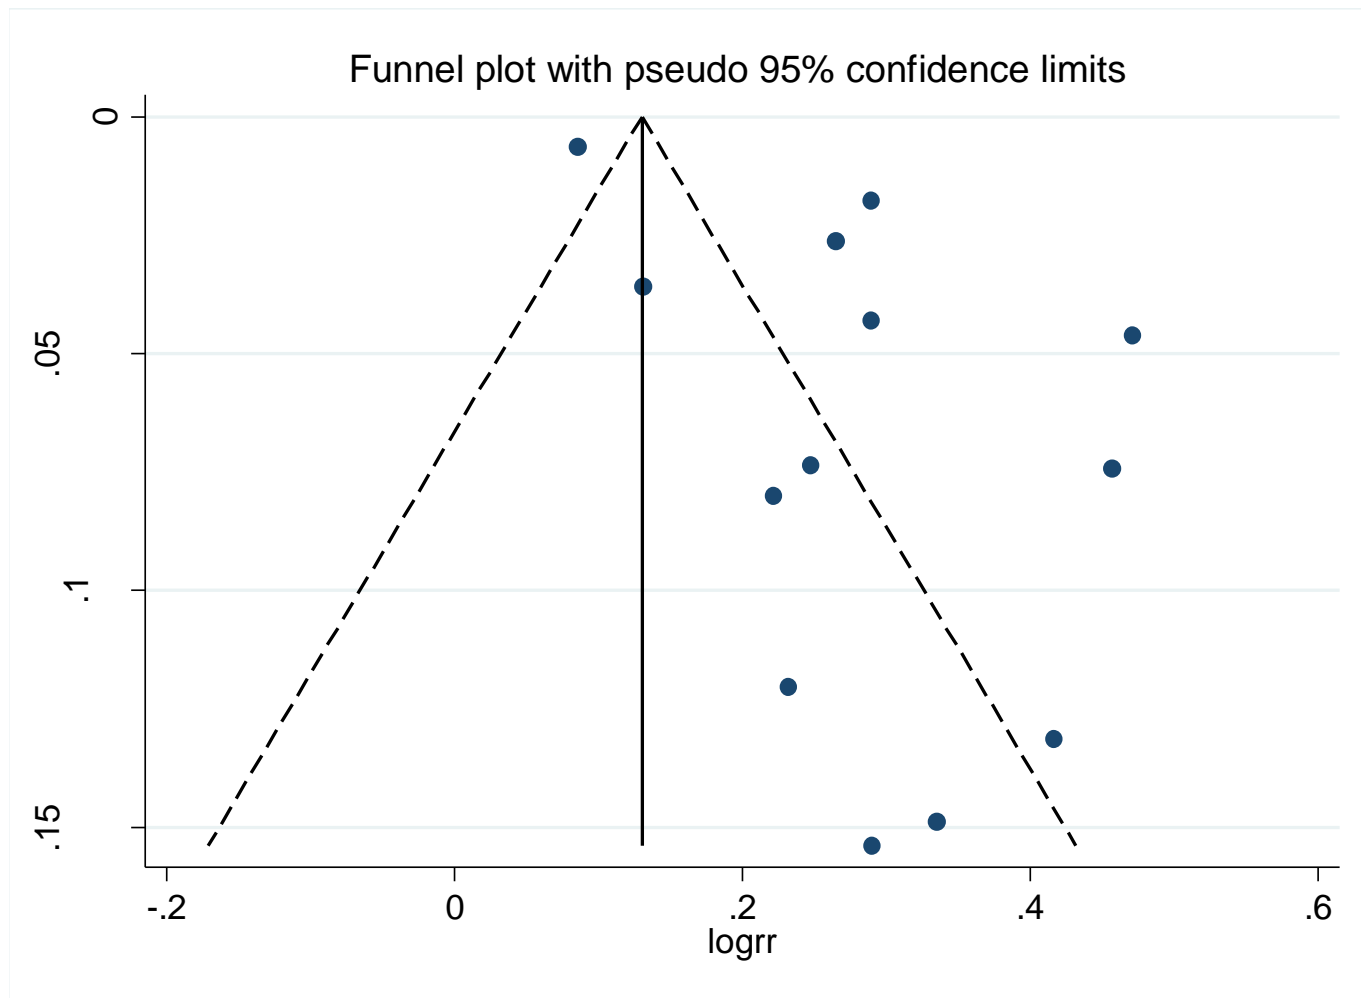

Supplementary Figure 4. Funnel plot for sensitivity analysis of body mass index and asthma (excluding Park et al, 2019)

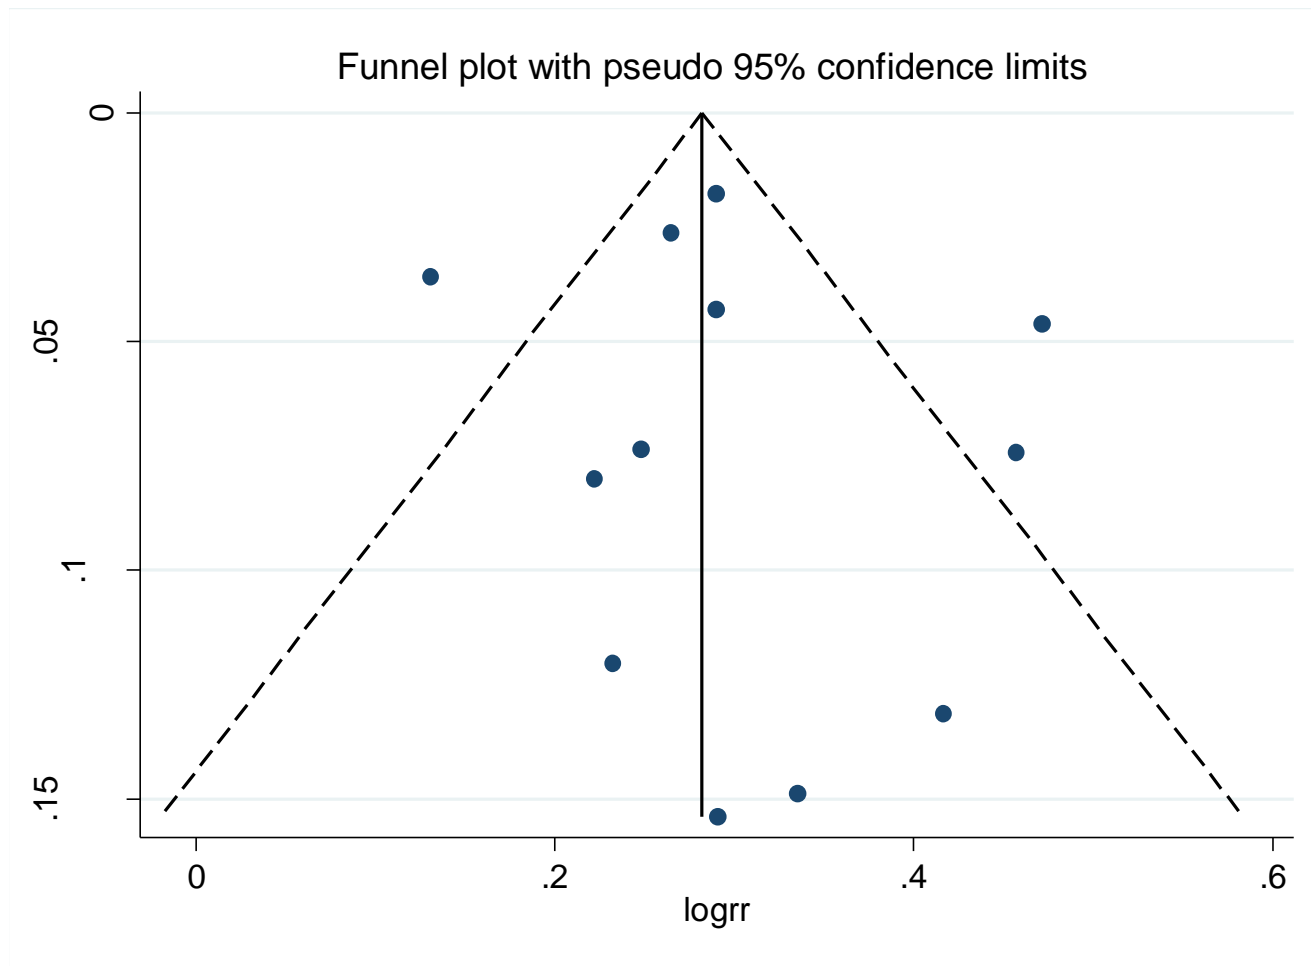



Supplementary Figure 5. Waist circumference and asthma, high vs. low analysis

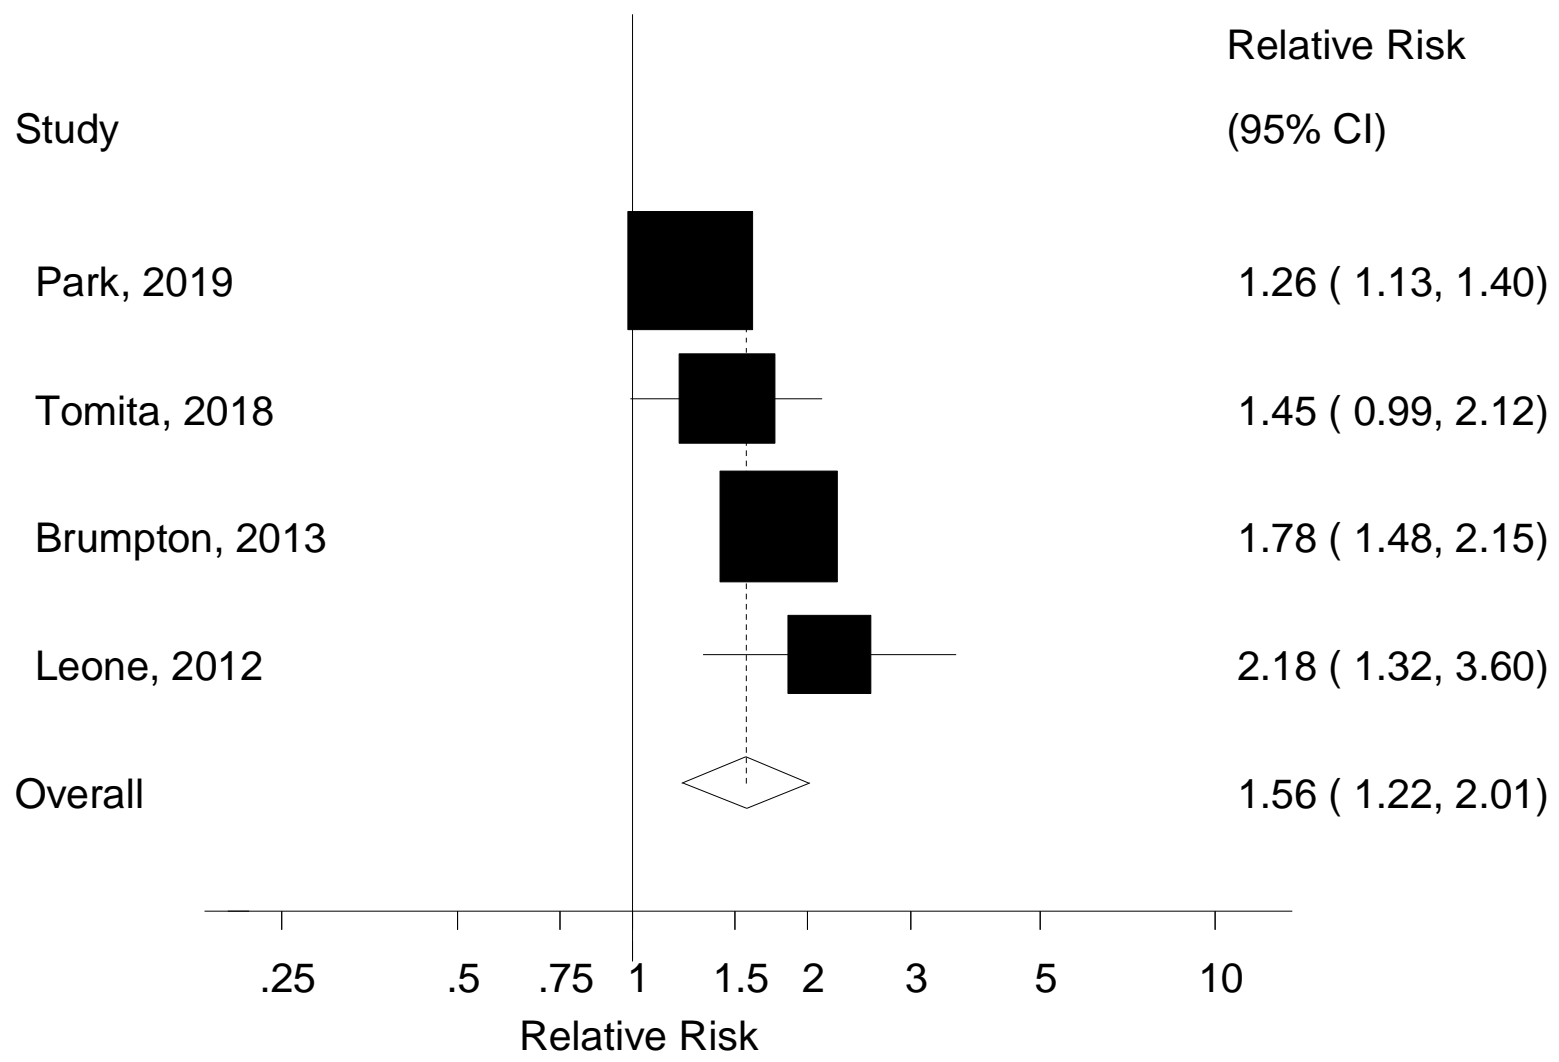

**Supplementary Figure 6. Waist circumference and asthma, influence analysis**

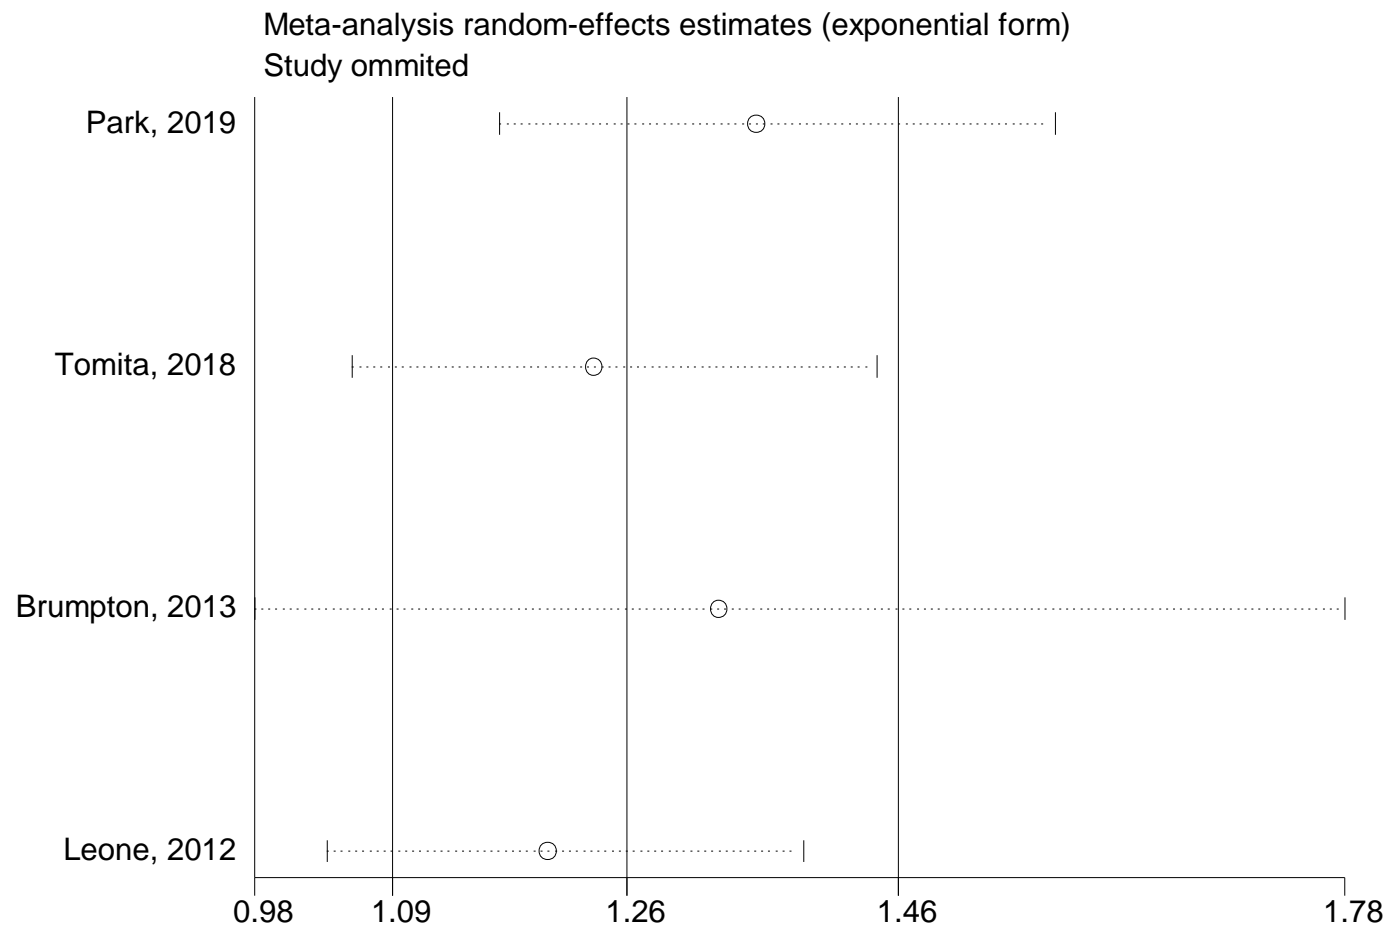

| <b>Study omitted</b> | <b>RR (95% CI)</b>      |
|----------------------|-------------------------|
| Park, 2019           | 1.35 (1.16-1.57)        |
| Tomita, 2018         | 1.23 (1.05-1.44)        |
| Brumpton, 2013       | 1.32 (0.98-1.78)        |
| Leone, 2012          | 1.19 (1.03-1.38)        |
| <b>Combined</b>      | <b>1.25 (1.08-1.45)</b> |

Supplementary Figure 7. Weight gain and asthma, high vs. low analysis

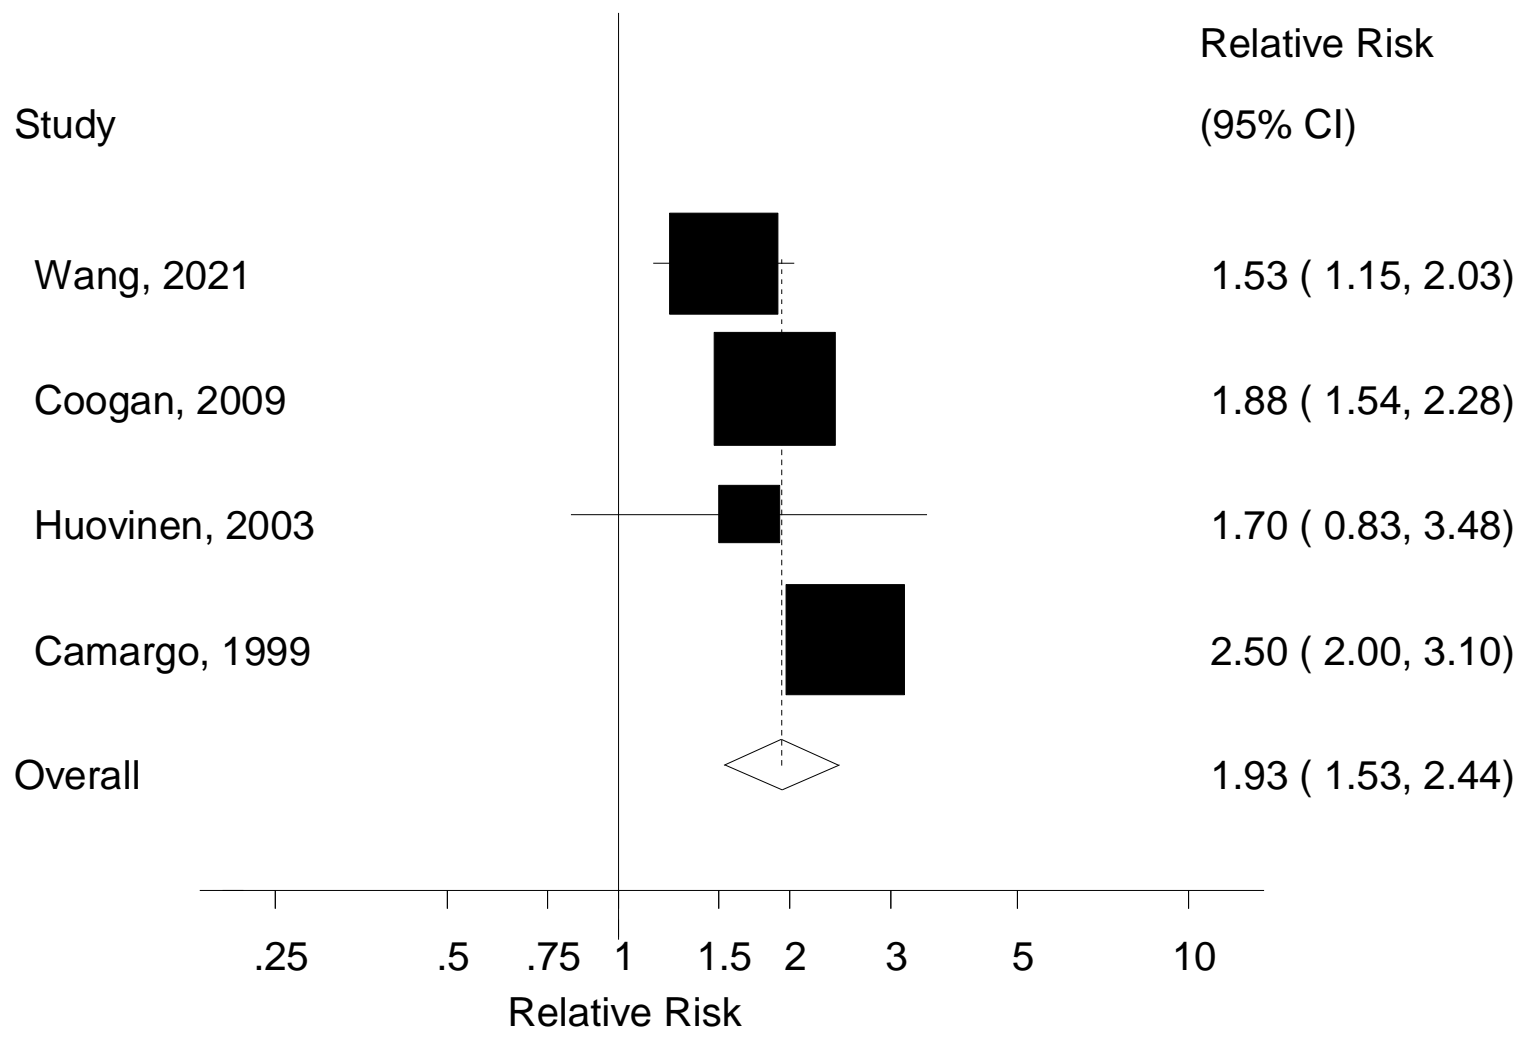

**Supplementary Figure 8. Weight gain and asthma, influence analysis**

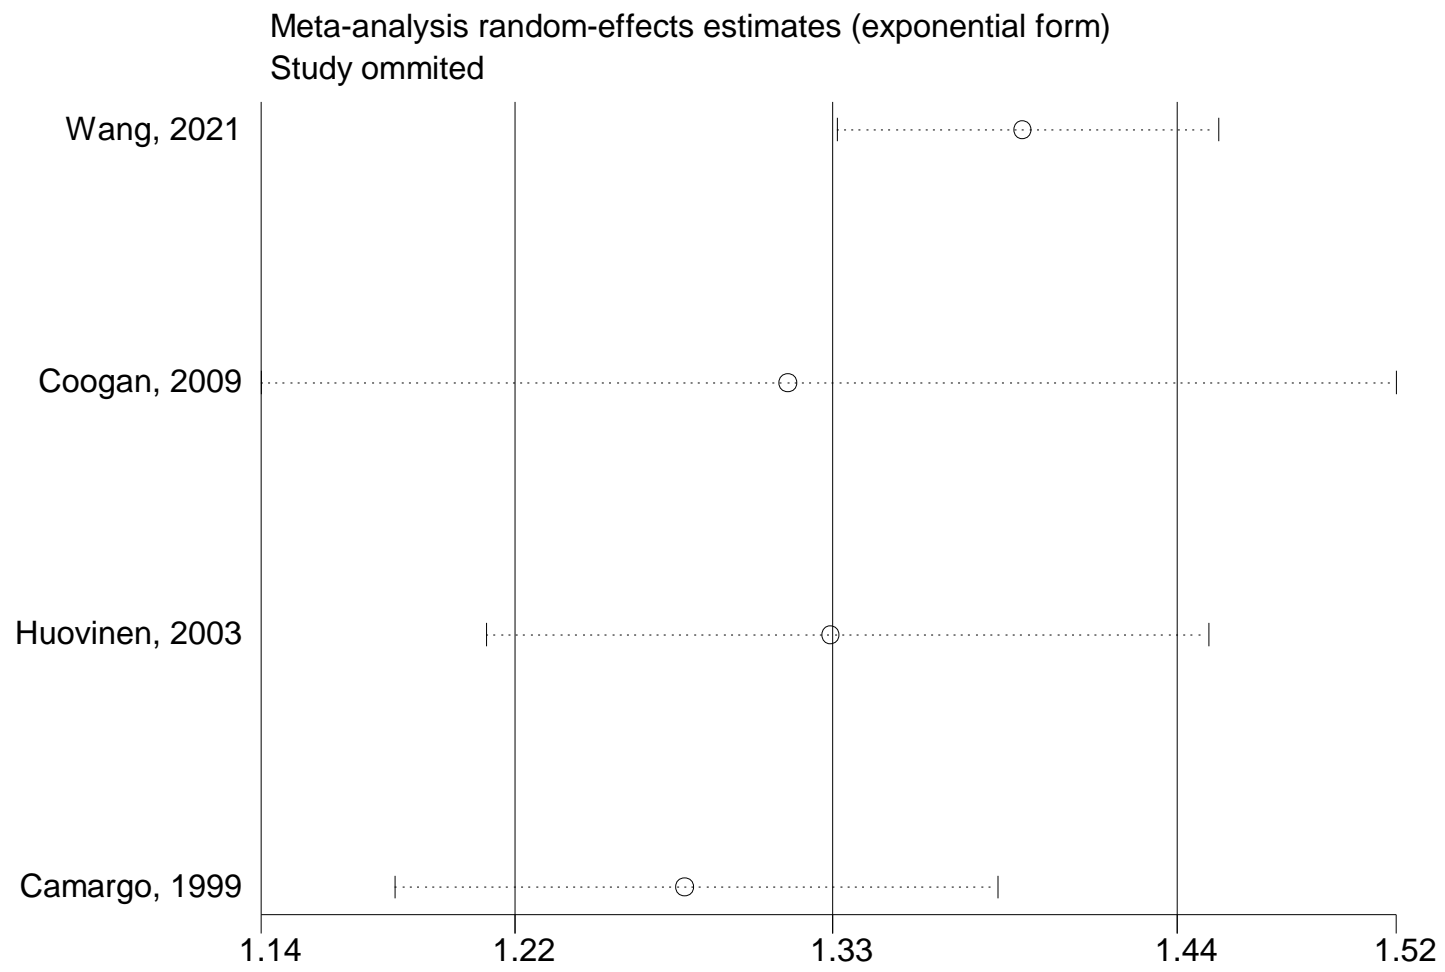

| <b>Study omitted</b> | <b>RR (95% CI)</b>      |
|----------------------|-------------------------|
| Wang, 2021           | 1.39 (1.32-1.45)        |
| Coogan, 2009         | 1.31 (1.13-1.51)        |
| Huovinen, 2003       | 1.32 (1.21-1.45)        |
| Camargo, 1999        | 1.27 (1.18-1.38)        |
| <b>Combined</b>      | <b>1.32 (1.22-1.44)</b> |

Supplementary Figure 9. Weight loss and asthma, influence analysis

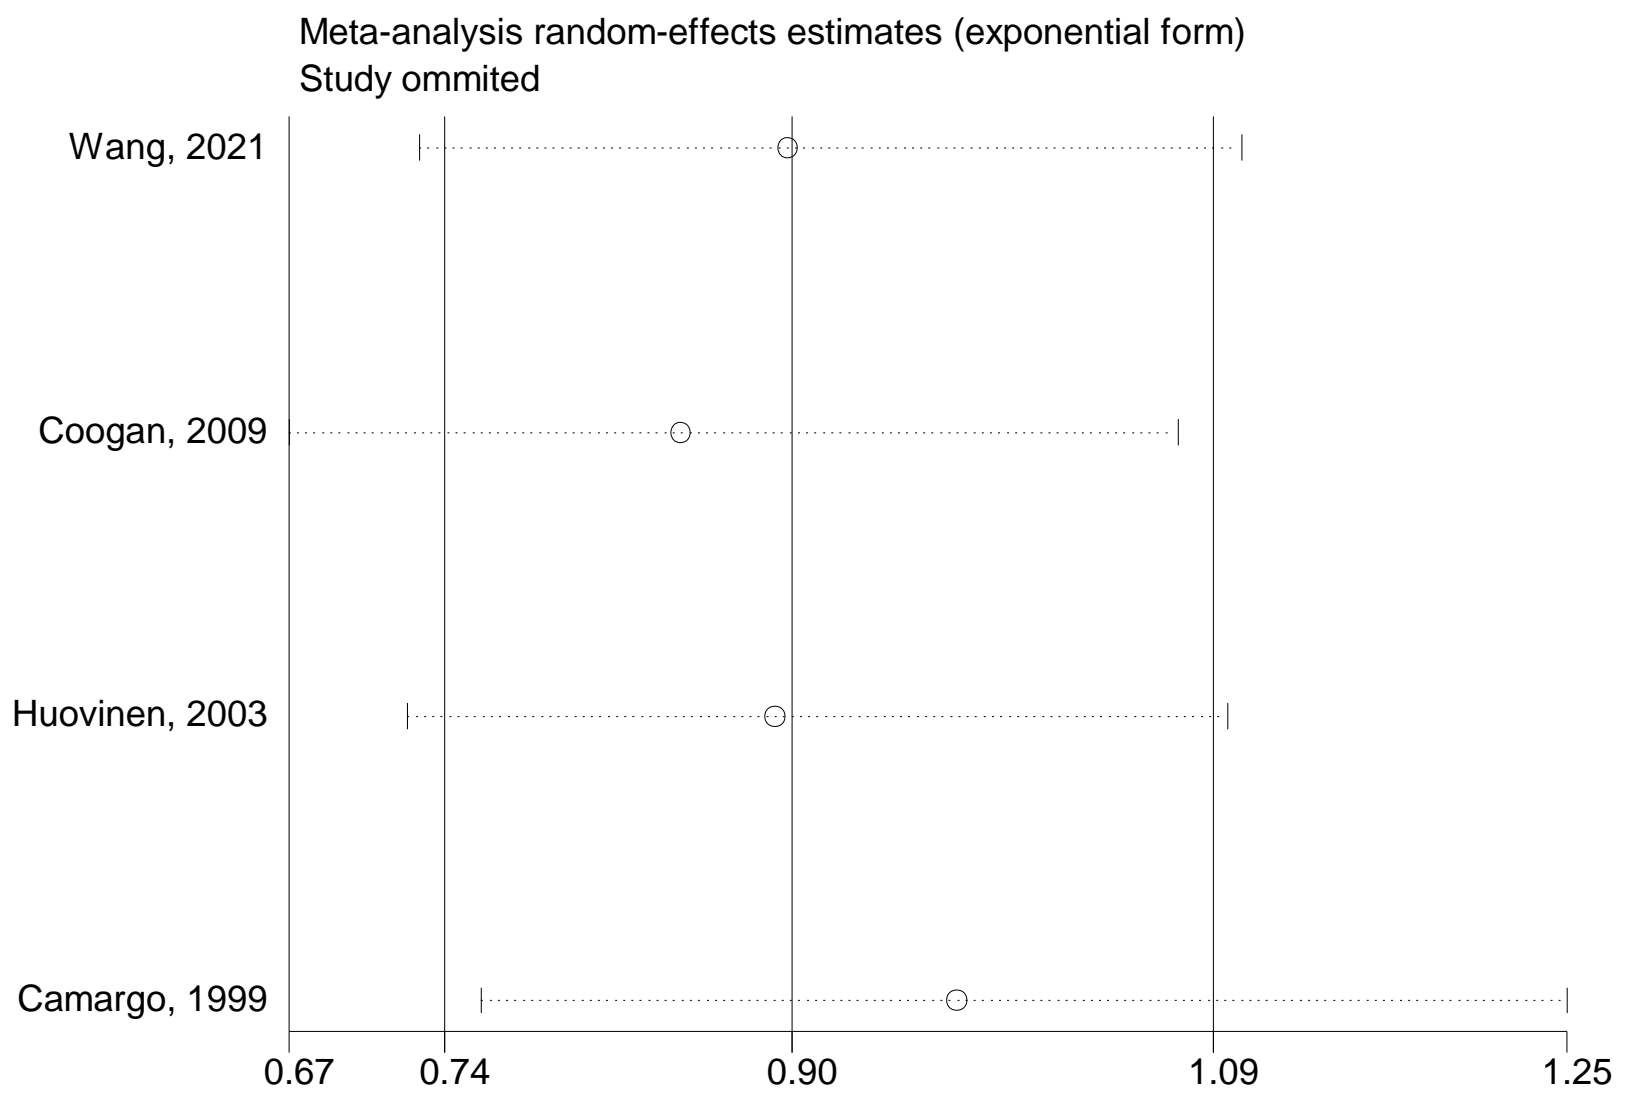

| Study omitted   | RR (95% CI)             |
|-----------------|-------------------------|
| Wang, 2021      | 0.89 (0.72-1.10)        |
| Coogan, 2009    | 0.84 (0.67-1.07)        |
| Huovinen, 2003  | 0.89 (0.72-1.09)        |
| Camargo, 1999   | 0.97 (0.75-1.25)        |
| <b>Combined</b> | <b>0.89 (0.74-1.09)</b> |
